# Supplementary material for: Economical Forms of State Pressure in Russian Regional Media
Source: publisher site journal article supplement (doi:10.18632/aging.205341), 2011-01-01
Supplement: Supplementary file [file aging-v16i1-205341-supplementary-material-SD1.pdf]

**SUPPLEMENTARY FIGURES**

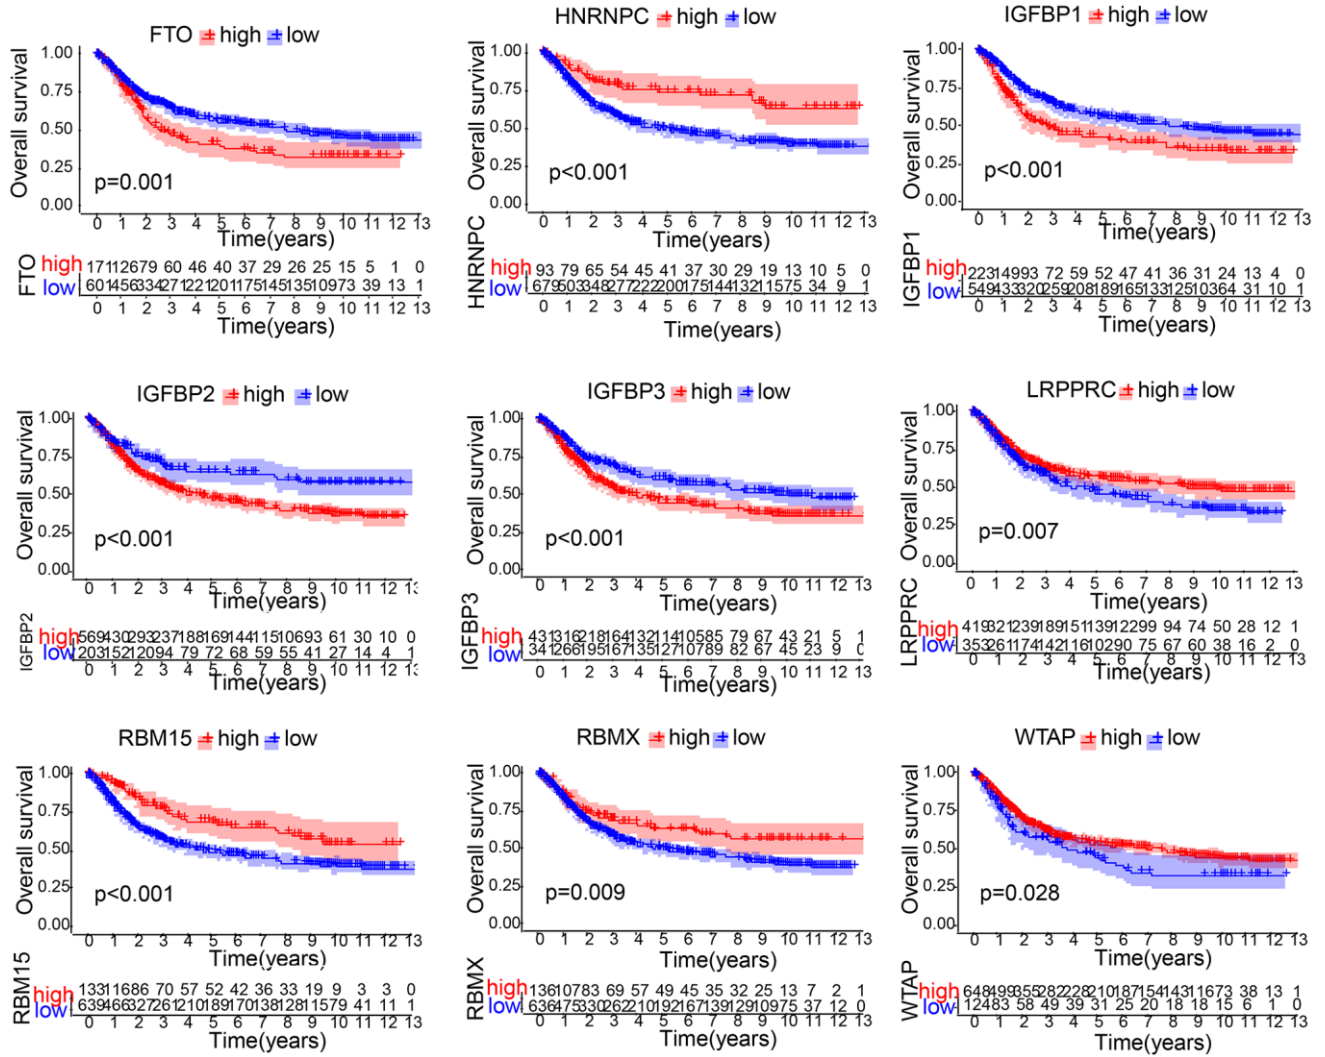

**Supplementary Figure 1. 18 m6A regulators' prognostic values in gastric cancer patients.**

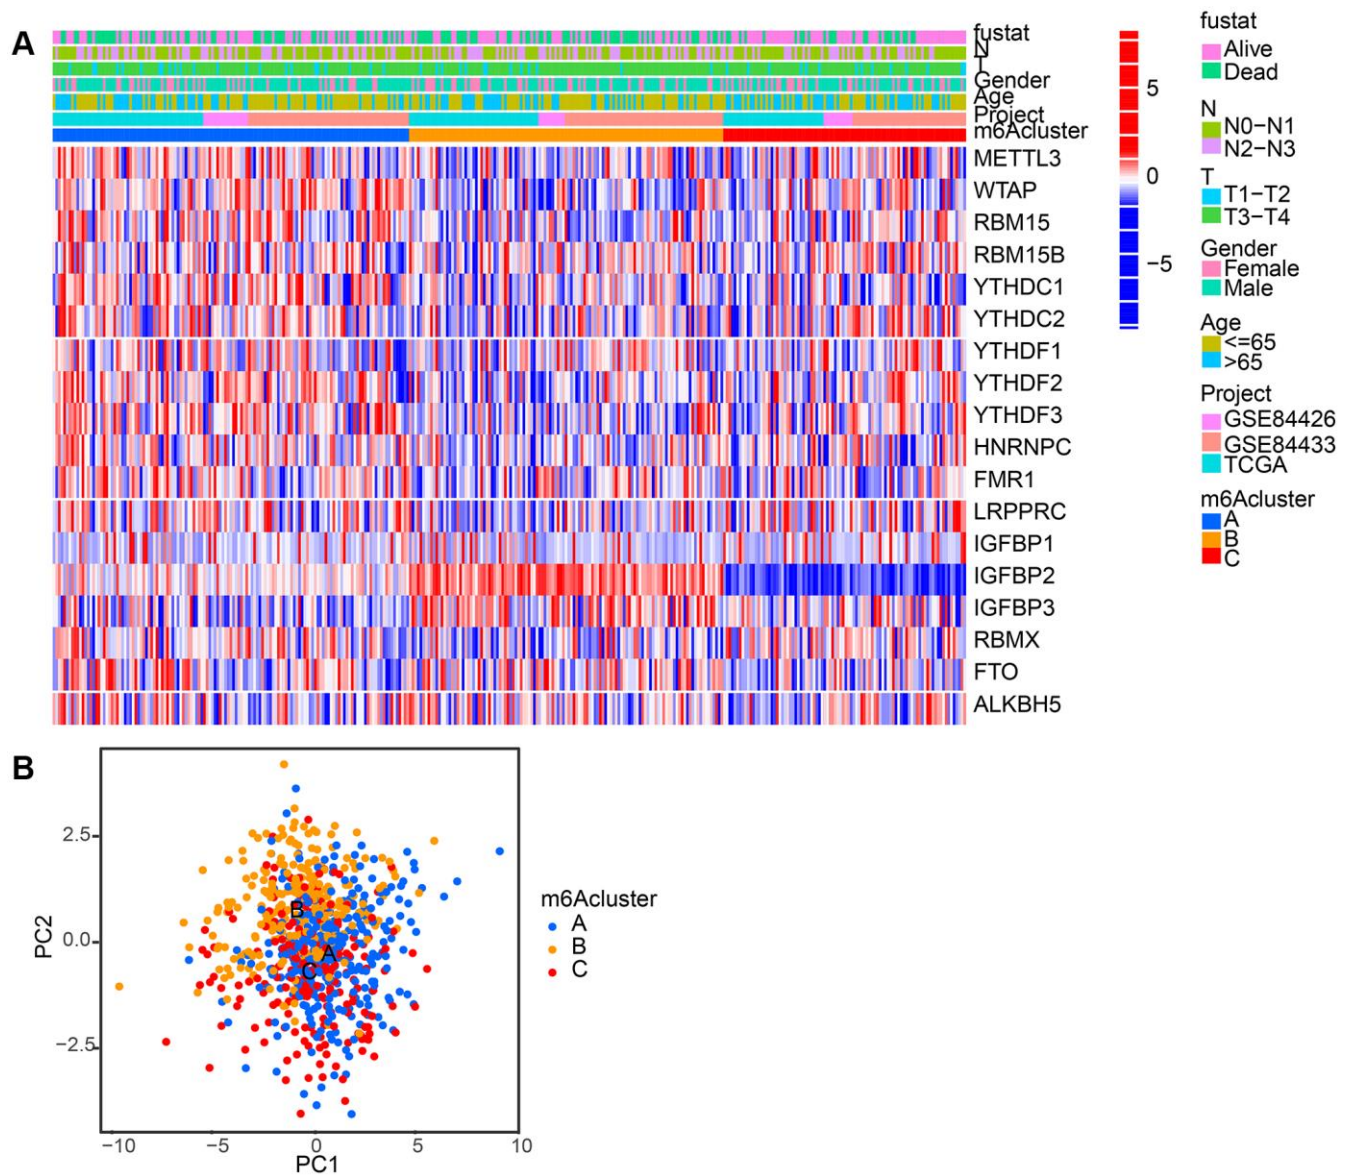

**Supplementary Figure 2. Patterns of m6A methylation modification mediated by 18 regulators. (A)** Unsupervised clustering of 18 m6A regulators in the 3 independent gastric cancer cohorts. **(B)** Principal component analysis conducted on the transcriptome profiles of three m6A modification patterns, demonstrating a significant transcriptome difference between different modification patterns.
