# Supplementary material for: Characterization of m6A methylation modifications in gastric cancer
Source: Aging (Albany NY). 2024 Jan 10;16(1):89–105. doi: 10.18632/aging.205341 (PMC10817395; doi:10.18632/aging.205341)
Supplement: Supplementary Table 1 [file aging-16-205341-s002.xlsx]

## Sheet: aging-23-017057-s002
Supplementary Table 1. The RNA expression of 18 m6A regulators.
ID	TCGA_TCGA-BR-A4J4	TCGA_TCGA-RD-A7C1	TCGA_TCGA-BR-6852	TCGA_TCGA-BR-7851	TCGA_TCGA-BR-8487	TCGA_TCGA-BR-6564	TCGA_TCGA-D7-6526	TCGA_TCGA-CD-8530	TCGA_TCGA-FP-7735	TCGA_TCGA-MX-A5UJ	TCGA_TCGA-BR-4367	TCGA_TCGA-D7-5578	TCGA_TCGA-VQ-A8PX	TCGA_TCGA-BR-8295	TCGA_TCGA-D7-8579	TCGA_TCGA-HU-A4G8	TCGA_TCGA-3M-AB46	TCGA_TCGA-D7-8572	TCGA_TCGA-VQ-A923	TCGA_TCGA-BR-6710	TCGA_TCGA-BR-6802	TCGA_TCGA-VQ-A91N	TCGA_TCGA-D7-8573	TCGA_TCGA-VQ-A91E	TCGA_TCGA-HU-A4GC	TCGA_TCGA-VQ-A8PP	TCGA_TCGA-MX-A5UG	TCGA_TCGA-CG-5732	TCGA_TCGA-CG-5719	TCGA_TCGA-CD-8532	TCGA_TCGA-HU-A4GT	TCGA_TCGA-BR-4280	TCGA_TCGA-VQ-A8PE	TCGA_TCGA-CG-4469	TCGA_TCGA-D7-6815	TCGA_TCGA-F1-6874	TCGA_TCGA-HU-8244	TCGA_TCGA-BR-4366	TCGA_TCGA-D7-6519	TCGA_TCGA-F1-A72C	TCGA_TCGA-BR-8690	TCGA_TCGA-CD-5803	TCGA_TCGA-CD-8528	TCGA_TCGA-BR-8365	TCGA_TCGA-RD-A7BS	TCGA_TCGA-VQ-A8PB	TCGA_TCGA-CG-4460	TCGA_TCGA-BR-A4CR	TCGA_TCGA-HU-A4H3
METTL3	6.13067	6.33235	6.44887	6.92086	6.13851	6.10457	6.72686	6.61667	5.9816	6.89855	5.82947	6.73223	6.40527	7.51587	6.62709	7.49579	6.16358	7.68933	6.85096	5.73979	7.02546	7.56077	6.87107	6.72477	6.45807	7.25728	6.77943	6.38709	5.94665	6.47863	6.62301	7.2938	7.67713	7.19474	6.91819	6.74341	6.23199	7.55764	6.31317	6.05218	5.31288	6.58366	7.54767	6.75245	6.07615	7.03924	6.79143	7.64993	6.6688
WTAP	6.78869	6.6241	6.8106	7.16911	6.51705	6.67369	6.15835	6.539	6.10815	6.69815	6.72992	6.4525	6.80396	6.69961	6.59091	7.1008	7.18843	7.22311	6.82061	6.27671	6.71235	7.35105	6.48889	6.51839	6.40736	7.25143	6.94891	6.26768	6.20193	6.25685	7.10912	6.85604	7.4571	6.48011	7.45509	7.16125	6.29569	8.0181	6.8377	6.29983	6.20929	6.80813	6.97615	6.67059	6.75877	6.95338	6.97175	7.37551	6.58298
RBM15	7.42422	6.82572	7.22489	7.88585	6.91387	6.82834	7.18481	6.96245	6.52141	7.00408	6.9579	7.12964	7.79333	7.29676	7.21241	8.17625	6.71904	8.00573	7.62721	6.40385	7.20335	7.61725	7.69351	7.67249	6.52711	7.69139	7.84235	6.70139	6.52113	7.13172	6.92371	7.01025	7.91027	7.20557	7.72803	8.32	7.08983	7.4703	6.48913	6.84847	6.87765	7.33428	7.97682	7.36117	6.40794	7.2577	7.06177	8.19012	7.19387
RBM15B	5.48474	5.76553	6.54696	7.24959	5.94774	6.69159	6.79131	6.36209	6.05597	6.35431	5.96284	5.84869	6.28716	6.55876	6.68677	6.38642	5.71134	7.29651	6.21024	5.82823	7.11957	6.99809	6.43768	6.63972	5.52981	7.17116	6.93267	6.35757	5.9894	6.12141	6.36984	6.55026	7.003	6.43957	7.14515	7.00396	6.26592	6.52645	6.28404	6.41848	5.21193	6.86255	7.5938	6.63842	5.53351	6.78502	5.94627	7.1519	6.052
YTHDC1	8.21218	6.91648	7.36114	8.10285	7.80255	7.63243	7.66275	7.74452	7.26609	7.79191	7.52983	7.57027	8.07252	7.76013	7.79554	8.22048	7.5763	8.18389	8.33595	7.12581	7.55895	7.89824	7.8009	7.89229	7.54673	8.47157	8.10501	7.12893	7.34434	7.63006	7.79042	7.81902	8.27365	8.24129	7.47843	7.89868	7.48589	8.43496	7.79299	7.2211	7.49519	7.92936	7.9209	7.77053	7.52491	8.05752	8.1319	8.46261	8.08474
YTHDC2	5.44184	5.53779	5.53001	5.68492	5.35512	4.66594	4.80529	5.40193	4.23553	5.52049	5.07897	4.61692	5.97289	4.58212	5.55705	6.19311	4.70398	5.6295	6.10024	4.70635	5.56698	5.86472	5.46255	6.14489	4.73806	6.20954	6.11835	4.96173	4.62952	5.64756	5.49268	5.79159	5.93987	6.10507	5.15337	6.14457	5.42261	5.3428	5.21192	5.66185	4.40206	5.32036	5.81715	5.51933	5.3923	6.3726	5.94021	5.50108	5.21148
YTHDF1	9.42959	8.66734	8.75661	9.05353	7.83153	8.20234	8.5735	8.43858	8.62555	8.25393	8.11077	9.0849	8.63396	8.99596	8.58379	8.74922	8.26983	9.30778	8.77159	7.57888	8.22401	9.14291	9.47687	8.60923	8.14282	8.94108	8.45486	8.77113	8.14638	8.85411	8.41237	8.80874	9.83695	8.65772	9.11486	9.01984	8.31246	9.07343	8.69831	8.72481	8.6543	8.35878	9.16512	8.46609	7.63344	8.22033	8.0749	9.27018	8.96599
YTHDF2	8.56647	7.26776	8.08667	8.81147	8.20899	7.41835	8.44705	8.28462	7.9169	8.07723	8.40295	8.39791	8.29656	9.05173	8.09781	8.57656	7.55962	8.88266	8.16189	7.41269	8.19698	8.4956	8.52213	7.765	7.85175	8.84134	8.30416	7.74711	7.55456	7.80998	8.58408	8.64091	8.57983	8.52777	8.55548	8.53963	7.84484	8.09714	8.12954	7.12294	8.37462	8.2257	9.09229	7.97734	7.20389	8.45901	8.17521	9.05089	8.23486
YTHDF3	7.54225	6.84996	7.29726	7.70245	6.53475	6.92735	6.79133	7.38881	6.80093	7.49261	8.2276	7.8447	7.87177	6.92955	7.52854	7.74536	5.91174	7.87238	7.3758	6.68981	7.38341	7.78283	7.3218	7.67555	7.14019	8.33146	7.90145	6.92033	6.72768	7.01228	7.13356	7.45689	7.74686	8.11896	8.0675	7.85777	7.1726	8.67819	7.21204	6.98325	6.78638	7.34806	7.72865	7.6269	6.7627	7.97829	8.04185	7.45961	7.22262
HNRNPC	8.74477	7.89621	8.39309	8.67219	8.40254	7.89674	8.34943	8.14703	8.22117	8.51434	8.39382	8.69551	8.07388	8.92156	7.94196	8.87866	8.60735	8.97851	8.17723	7.41736	8.54413	8.655	8.71832	8.28123	8.23497	8.73302	8.27282	8.43803	8.2002	8.24698	8.97155	8.71967	9.23244	8.38722	8.39731	8.70062	8.0631	8.88207	8.43488	8.05846	7.75073	8.64372	9.09429	8.08482	7.82269	8.89575	8.73003	9.33552	8.41365
FMR1	4.81804	4.94985	4.92327	5.21696	4.67643	4.62078	5.14096	4.6638	4.43392	4.72787	4.8537	4.4113	4.98467	4.34515	4.73915	5.32341	5.18212	4.96481	5.48516	4.17682	5.49437	5.06947	5.09243	4.9098	4.29068	5.62011	5.08655	4.15426	4.39391	4.83094	4.8697	4.85099	4.98557	6.09195	5.33926	5.38516	4.3847	5.61701	4.77008	5.73158	4.73471	4.94281	5.16621	4.96675	4.90214	5.13735	5.07446	5.81112	4.83707
LRPPRC	8.11615	7.95467	7.95084	8.93902	7.55423	6.96735	8.26682	7.86599	7.27086	7.92222	8.38471	7.78223	8.71147	8.808	7.92333	9.03392	7.5369	8.40385	7.93336	6.80918	7.79232	9.26018	8.84648	8.65619	7.60097	8.19496	8.32366	7.45367	6.95137	8.13843	8.44706	8.90852	9.13502	8.65883	8.87068	8.41722	8.40906	9.32926	7.72864	8.06785	6.95957	7.91623	9.5378	7.82517	7.27189	9.3744	7.95772	8.70759	7.79245
IGFBP1	3.20759	4.09217	3.31267	3.23891	3.20759	4.48574	3.31593	3.46611	5.21135	3.20759	3.33373	4.33973	4.00105	3.83276	3.2341	3.31813	3.30732	6.40034	3.26426	3.71612	5.76128	4.64464	3.26651	3.23055	3.30474	3.65152	4.15618	7.24425	4.14612	3.29175	3.35347	4.07017	5.0111	3.56439	4.32318	4.07231	3.23924	6.15257	6.91935	7.79999	4.37937	4.52469	3.51815	3.35124	5.57402	5.43994	3.37236	7.75385	3.20759
IGFBP2	9.34965	9.19091	8.32272	10.0612	7.25611	9.3001	9.28404	9.27937	8.81218	9.25637	4.83931	8.74715	9.91267	11.8429	8.01863	9.55247	6.73131	9.20105	8.5616	10.2853	6.9772	8.44522	9.65424	7.93799	6.80518	7.14365	8.05571	9.72219	9.6126	9.91365	9.22798	5.41563	5.56911	3.83881	8.52659	6.97421	8.32018	8.07586	10.1216	9.88014	6.69987	8.82403	9.71439	8.56238	7.7777	9.44484	7.21329	10.5556	10.483
IGFBP3	9.12906	7.23881	8.94961	9.28696	8.56979	11.3341	9.2642	10.3024	9.3742	8.58263	8.66203	8.93181	8.45519	8.31105	8.16635	8.3459	8.96388	9.51458	7.37195	9.59662	8.99279	8.58525	7.30556	8.02727	8.39268	12.061	8.44928	8.15541	9.0836	10.3388	8.37935	8.43209	8.82942	9.32965	10.1973	9.81022	5.60668	9.50018	11.0517	9.66107	9.309	11.2948	9.08052	9.41962	9.88181	11.059	10.6051	10.5788	9.96914
RBMX	8.32052	8.39971	8.14682	8.71083	8.28799	7.87791	8.65179	8.08193	8.21911	8.30788	8.3324	8.8591	8.44793	8.47895	7.94121	8.85858	8.2506	8.78826	8.78233	7.27218	8.38335	8.72382	8.64016	8.19101	7.78228	8.67027	8.73801	7.82461	8.29673	8.26907	8.74455	9.04126	8.88549	9.32113	8.57433	8.5124	8.3306	8.57989	8.48631	8.07805	8.03435	8.71838	9.0291	8.23238	7.8158	8.99717	9.13098	9.38988	8.21712
FTO	6.00632	5.17639	5.13984	5.64008	4.56595	5.98317	4.96504	5.74332	5.44178	5.542	5.49608	5.10174	5.14687	4.71681	6.03643	5.65926	4.26154	6.22852	5.70221	4.90081	5.18794	5.22675	5.97204	5.42953	4.91636	6.25411	6.31617	4.92786	5.62535	6.19271	4.80814	5.37526	5.4969	5.26516	5.85526	5.85694	5.21352	5.16881	4.94577	5.60821	4.55032	5.95192	6.2473	6.51454	5.32463	5.65213	6.00431	6.44271	5.29212
ALKBH5	10.1486	9.00235	9.88951	10.2705	9.19076	10.0967	9.34453	9.79921	9.52833	9.84553	9.13545	9.44869	9.63315	9.72495	9.86468	10.0066	8.26655	10.2135	10.1702	9.30663	9.65044	10.0843	10.4311	10.0686	9.03448	10.3601	9.72989	9.08767	8.99375	10.0478	9.52003	9.66982	10.3541	8.47583	9.09697	9.32579	9.35174	9.4111	9.49942	9.1137	8.89649	9.61981	10.2505	10.3136	9.03779	9.84508	9.28981	10.8659	9.86968
[truncated: 727 more columns]
