# Supplementary material for: Characterization of m6A methylation modifications in gastric cancer
Source: Aging (Albany NY). 2024 Jan 10;16(1):89–105. doi: 10.18632/aging.205341 (PMC10817395; doi:10.18632/aging.205341)
Supplement: Supplementary Table 2 [file aging-16-205341-s003.xlsx]

## Sheet: aging-23-017057-s003
Supplementary Table 2. The RNA expression of 7 intersect DEGs from different m6Aclusters.
id	TCGA_TCGA-BR-A4J4	TCGA_TCGA-RD-A7C1	TCGA_TCGA-BR-6852	TCGA_TCGA-BR-7851	TCGA_TCGA-BR-8487	TCGA_TCGA-BR-6564	TCGA_TCGA-D7-6526	TCGA_TCGA-CD-8530	TCGA_TCGA-FP-7735	TCGA_TCGA-MX-A5UJ	TCGA_TCGA-BR-4367	TCGA_TCGA-D7-5578	TCGA_TCGA-VQ-A8PX	TCGA_TCGA-BR-8295	TCGA_TCGA-D7-8579	TCGA_TCGA-HU-A4G8	TCGA_TCGA-3M-AB46	TCGA_TCGA-D7-8572	TCGA_TCGA-VQ-A923	TCGA_TCGA-BR-6710	TCGA_TCGA-BR-6802	TCGA_TCGA-VQ-A91N	TCGA_TCGA-D7-8573	TCGA_TCGA-VQ-A91E	TCGA_TCGA-HU-A4GC	TCGA_TCGA-VQ-A8PP	TCGA_TCGA-MX-A5UG	TCGA_TCGA-CG-5732	TCGA_TCGA-CG-5719	TCGA_TCGA-CD-8532	TCGA_TCGA-HU-A4GT	TCGA_TCGA-BR-4280	TCGA_TCGA-VQ-A8PE	TCGA_TCGA-CG-4469	TCGA_TCGA-D7-6815	TCGA_TCGA-F1-6874	TCGA_TCGA-HU-8244	TCGA_TCGA-BR-4366	TCGA_TCGA-D7-6519	TCGA_TCGA-F1-A72C	TCGA_TCGA-BR-8690	TCGA_TCGA-CD-5803	TCGA_TCGA-CD-8528	TCGA_TCGA-BR-8365	TCGA_TCGA-RD-A7BS	TCGA_TCGA-VQ-A8PB	TCGA_TCGA-CG-4460	TCGA_TCGA-BR-A4CR	TCGA_TCGA-HU-A4H3
IGFBP2	9.34965	9.19091	8.32272	10.0612	7.25611	9.3001	9.28404	9.27937	8.81218	9.25637	4.83931	8.74715	9.91267	11.8429	8.01863	9.55247	6.73131	9.20105	8.5616	10.2853	6.9772	8.44522	9.65424	7.93799	6.80518	7.14365	8.05571	9.72219	9.6126	9.91365	9.22798	5.41563	5.56911	3.83881	8.52659	6.97421	8.32018	8.07586	10.1216	9.88014	6.69987	8.82403	9.71439	8.56238	7.7777	9.44484	7.21329	10.5556	10.483
IGFBP3	9.12906	7.23881	8.94961	9.28696	8.56979	11.3341	9.2642	10.3024	9.3742	8.58263	8.66203	8.93181	8.45519	8.31105	8.16635	8.3459	8.96388	9.51458	7.37195	9.59662	8.99279	8.58525	7.30556	8.02727	8.39268	12.061	8.44928	8.15541	9.0836	10.3388	8.37935	8.43209	8.82942	9.32965	10.1973	9.81022	5.60668	9.50018	11.0517	9.66107	9.309	11.2948	9.08052	9.41962	9.88181	11.059	10.6051	10.5788	9.96914
LACTB2	8.34663	7.89741	8.23788	7.57901	8.69923	6.59619	7.73165	7.51344	8.19374	7.51718	8.65904	9.22047	7.84246	7.54167	7.85441	8.62999	7.46848	7.45978	7.24629	6.35004	8.24001	8.99786	4.14351	7.57052	9.73547	7.07073	8.10711	8.15969	7.33592	8.27857	9.50999	8.18514	8.57352	9.58014	9.05732	8.59912	8.22245	9.78161	7.20854	8.37461	9.28636	7.29977	8.2877	7.12769	7.68229	8.20616	7.33082	8.25835	8.35517
CLIC5	4.31682	4.62065	5.18254	5.6614	4.97063	5.03942	5.78525	5.29469	3.97614	4.59635	5.17129	5.30612	4.77231	3.76855	5.67713	5.83521	5.14058	7.15344	5.20874	4.55806	7.23856	5.19229	3.94637	4.57479	4.20548	6.15238	5.57752	5.31199	5.43303	5.07723	6.1303	6.3647	8.65884	5.26989	5.57342	6.49476	5.40182	6.30912	4.71076	4.45291	6.58828	5.65936	4.64812	5.72854	5.93012	3.93908	4.53579	5.03881	4.54346
CYB5B	9.43466	8.50773	10.0269	9.62802	9.39164	8.38868	9.51394	8.36595	9.84834	8.74615	9.47728	8.91368	8.48627	8.26963	9.199	9.67701	8.66363	9.14175	8.83878	8.07804	9.42021	8.76931	10.2078	9.01832	8.93774	8.98355	8.6039	8.95004	9.30649	9.4082	9.36981	9.85395	10.2479	9.68527	9.82034	9.45368	8.98217	9.2594	8.61111	10.3074	8.88413	8.95635	9.3728	8.80791	8.5696	8.9863	9.71691	8.63589	8.95496
BATF2	6.98881	5.7994	8.04709	4.97197	6.09523	6.51499	5.7848	5.19773	4.641	6.19465	7.06809	5.64651	6.45195	4.40301	5.69848	7.80792	5.49663	6.87918	7.00273	5.34174	7.99858	6.20614	6.7098	6.27806	5.04984	5.9019	5.75457	5.77215	5.53779	6.66837	6.93938	7.45158	8.24269	5.65257	6.14125	7.27084	5.50085	6.20487	6.82242	6.8691	7.9638	6.75645	4.89132	5.76793	6.30268	4.65939	4.74495	4.89313	5.12054
SUSD2	4.88985	5.26873	6.67094	6.17338	4.99758	6.98375	6.19691	6.09329	5.95074	5.96469	5.12695	6.18201	6.54117	5.02497	6.51689	5.65972	4.78838	6.56955	5.76874	7.14978	6.96239	4.46658	9.76894	5.11772	6.32502	5.71636	7.30539	6.88732	7.08357	6.589	7.37278	4.99272	6.29914	5.73899	6.72019	6.58546	5.10818	6.29347	6.9565	6.69196	5.13329	7.3638	4.37548	7.10676	5.66426	5.88814	5.08813	4.81463	6.11516
[truncated: 727 more columns]
