# Supplementary material for: Characterization of m6A methylation modifications in gastric cancer
Source: Aging (Albany NY). 2024 Jan 10;16(1):89–105. doi: 10.18632/aging.205341 (PMC10817395; doi:10.18632/aging.205341)
Supplement: Supplementary Table 3 [file aging-16-205341-s004.xlsx]

## Sheet: aging-23-017057-s004
Supplementary Table 3. m6Ascore of gastric cancer patients from TCGA and GEO.
id	futime	fustat	m6Ascore	sampleType	group
TCGA-BR-A4J4	0.0438356	0	0.965074	TCGA	High
TCGA-RD-A7C1	1.38904	1	1.62187	TCGA	High
TCGA-BR-6852	3.74521	0	0.158741	TCGA	High
TCGA-BR-7851	1.03562	0	-1.03367	TCGA	Low
TCGA-BR-8487	0.0931507	0	1.70628	TCGA	High
TCGA-BR-6564	2.17534	1	-3.10158	TCGA	Low
TCGA-D7-6526	1.43288	0	-0.627939	TCGA	Low
TCGA-CD-8530	1.03288	0	-1.78039	TCGA	Low
TCGA-FP-7735	0.290411	1	-0.542804	TCGA	Low
TCGA-MX-A5UJ	1.64384	0	0.0470685	TCGA	High
TCGA-BR-4367	0	0	2.5086	TCGA	High
TCGA-D7-5578	1.05479	0	-0.372838	TCGA	Low
TCGA-VQ-A8PX	5.38082	0	-0.592476	TCGA	Low
TCGA-BR-8295	0.183562	1	-0.206614	TCGA	Low
TCGA-D7-8579	1.74247	0	0.221713	TCGA	High
TCGA-HU-A4G8	1.89041	0	1.06393	TCGA	High
TCGA-3M-AB46	4.83562	0	1.42028	TCGA	High
TCGA-D7-8572	1.4	0	-0.969528	TCGA	Low
TCGA-VQ-A923	0	1	1.62104	TCGA	High
TCGA-BR-6710	0.747945	0	-2.55503	TCGA	Low
TCGA-BR-6802	2.57534	0	0.0961267	TCGA	High
TCGA-VQ-A91N	1.56164	1	1.70448	TCGA	High
TCGA-D7-8573	1.62466	0	-2.14174	TCGA	Low
TCGA-VQ-A91E	1.81918	0	1.76762	TCGA	High
TCGA-HU-A4GC	0.271233	0	0.364175	TCGA	High
TCGA-VQ-A8PP	1.95068	1	-1.83759	TCGA	Low
TCGA-MX-A5UG	0.309589	1	-0.886286	TCGA	Low
TCGA-CG-5732	5.75342	1	-0.676985	TCGA	Low
TCGA-CG-5719	0.0849315	0	-1.5298	TCGA	Low
TCGA-CD-8532	0.969863	1	-1.84024	TCGA	Low
TCGA-HU-A4GT	0.542466	0	-0.76367	TCGA	Low
TCGA-BR-4280	0.550685	1	2.83053	TCGA	High
TCGA-VQ-A8PE	1.84932	1	1.54061	TCGA	High
TCGA-CG-4469	0.589041	1	1.41	TCGA	High
TCGA-D7-6815	1.33151	0	-1.46013	TCGA	Low
TCGA-F1-6874	1.20548	0	-0.367451	TCGA	Low
TCGA-HU-8244	2.03288	0	3.36753	TCGA	High
TCGA-BR-4366	0	0	-0.497055	TCGA	Low
TCGA-D7-6519	1.71233	0	-2.9702	TCGA	Low
TCGA-F1-A72C	0.947945	0	-1.1182	TCGA	Low
TCGA-BR-8690	0.890411	0	1.50408	TCGA	High
TCGA-CD-5803	0.934247	1	-3.08123	TCGA	Low
TCGA-CD-8528	1.0274	0	0.83685	TCGA	High
TCGA-BR-8365	1.46027	1	-1.56497	TCGA	Low
TCGA-RD-A7BS	0.920548	1	-0.264883	TCGA	Low
TCGA-VQ-A8PB	2.85753	1	-2.21487	TCGA	Low
TCGA-CG-4460	1.83288	1	-0.227046	TCGA	Low
TCGA-BR-A4CR	0	0	-1.19488	TCGA	Low
TCGA-HU-A4H3	2.41644	0	-1.77549	TCGA	Low
TCGA-VQ-A8E3	1.81096	1	2.48027	TCGA	High
TCGA-BR-8380	0.0575342	0	-1.89966	TCGA	Low
TCGA-D7-6520	1.56986	0	-3.15961	TCGA	Low
TCGA-BR-6801	3.35068	0	1.49008	TCGA	High
TCGA-R5-A7O7	3.80548	0	0.131674	TCGA	High
TCGA-HU-A4H5	1.98356	0	-2.48904	TCGA	Low
TCGA-CD-5804	0	0	-2.01073	TCGA	Low
TCGA-CD-8526	1.04384	0	-0.821948	TCGA	Low
TCGA-IN-8663	0.282192	1	2.73085	TCGA	High
TCGA-BR-7197	0.767123	0	1.74509	TCGA	High
TCGA-BR-8381	0.613699	0	-3.31459	TCGA	Low
TCGA-BR-8676	0.627397	0	1.30957	TCGA	High
TCGA-BR-7723	2.39452	1	-1.0096	TCGA	Low
TCGA-HF-7134	4.35068	0	-0.794709	TCGA	Low
TCGA-R5-A7ZE	1.51781	1	1.42632	TCGA	High
TCGA-RD-A7BW	0.427397	1	-2.18745	TCGA	Low
TCGA-BR-4357	0	0	-0.225071	TCGA	Low
TCGA-BR-8683	0.821918	1	-1.48931	TCGA	Low
TCGA-BR-6707	1.65753	1	-2.32457	TCGA	Low
TCGA-MX-A663	0.821918	1	-2.60696	TCGA	Low
TCGA-D7-A6EX	0.942466	0	0.822352	TCGA	High
TCGA-BR-8081	2.68767	0	1.69842	TCGA	High
TCGA-BR-8372	2.60548	0	0.78887	TCGA	High
TCGA-CD-A489	0.942466	1	-1.60538	TCGA	Low
TCGA-BR-8589	2.26027	0	3.01603	TCGA	High
TCGA-VQ-A91V	3.55342	0	2.21253	TCGA	High
TCGA-BR-A44T	2.84384	0	1.41602	TCGA	High
TCGA-CD-A48C	0.967123	1	0.251325	TCGA	High
TCGA-CD-5801	1.09863	1	-0.56021	TCGA	Low
TCGA-BR-8680	2.66301	0	1.57447	TCGA	High
TCGA-BR-8361	2.59178	0	-0.984933	TCGA	Low
TCGA-CG-5722	0.0821918	0	-0.665482	TCGA	Low
TCGA-VQ-AA6F	4.50959	0	-0.0638644	TCGA	High
TCGA-HU-A4HB	1.30685	1	-0.469018	TCGA	Low
TCGA-VQ-A8E7	3.11781	0	0.62338	TCGA	High
TCGA-VQ-A8DU	0.454795	1	0.988555	TCGA	High
TCGA-BR-6455	1.15616	1	-3.50616	TCGA	Low
TCGA-VQ-A91K	5.10137	0	0.856344	TCGA	High
TCGA-BR-6454	0	0	-1.47768	TCGA	Low
TCGA-VQ-A94T	0.936986	1	-0.880866	TCGA	Low
TCGA-VQ-A8PH	1.06575	1	1.81323	TCGA	High
TCGA-B7-A5TI	1.63014	0	-1.87283	TCGA	Low
TCGA-BR-8382	2.08767	1	1.45217	TCGA	High
TCGA-KB-A93H	3.13699	0	4.56087	TCGA	High
TCGA-D7-6522	1.55068	0	-1.51668	TCGA	Low
TCGA-BR-A4IV	2.38082	1	-0.261708	TCGA	Low
TCGA-BR-6803	2.6	0	-2.03003	TCGA	Low
TCGA-BR-4191	1.52877	1	-0.174603	TCGA	Low
TCGA-BR-8588	1.06575	0	-0.94034	TCGA	Low
TCGA-IN-A7NR	0.542466	0	-0.607018	TCGA	Low
TCGA-VQ-AA6A	3.24384	0	-1.67896	TCGA	Low
TCGA-FP-7916	1.1726	1	-0.342584	TCGA	Low
TCGA-HU-8604	1.90137	0	1.7064	TCGA	High
TCGA-BR-4371	0	0	2.67403	TCGA	High
TCGA-IN-A6RJ	1.03836	0	2.80913	TCGA	High
TCGA-BR-8590	0.778082	1	-2.06527	TCGA	Low
TCGA-CD-8535	1.06849	0	-0.0752421	TCGA	High
TCGA-F1-6875	6.01918	1	0.290038	TCGA	High
TCGA-HU-8249	2.4137	0	2.22132	TCGA	High
TCGA-BR-7901	0.287671	1	-2.30692	TCGA	Low
TCGA-D7-6818	1.03014	1	-1.74047	TCGA	Low
TCGA-BR-7958	2.46301	0	0.923671	TCGA	High
TCGA-CD-A486	0.526027	1	-1.9213	TCGA	Low
TCGA-BR-A4J6	0.0547945	0	-2.35008	TCGA	Low
TCGA-FP-8209	4.96164	1	-1.1154	TCGA	Low
TCGA-CD-8534	1.00548	0	1.60453	TCGA	High
TCGA-VQ-A924	4.61918	1	1.88527	TCGA	High
TCGA-CD-8527	0.59726	1	-0.142679	TCGA	Low
TCGA-BR-4369	0	0	-2.06143	TCGA	Low
TCGA-HU-A4GQ	0.00821918	1	2.46792	TCGA	High
TCGA-D7-A6EZ	1.69315	1	0.436086	TCGA	High
TCGA-B7-A5TK	0.789041	0	0.964765	TCGA	High
TCGA-D7-A4YU	1.36986	0	0.804779	TCGA	High
TCGA-CG-5725	1.25205	1	-1.04741	TCGA	Low
TCGA-BR-6563	3.26027	0	-0.728853	TCGA	Low
TCGA-IN-AB1X	1.12603	0	-2.55854	TCGA	Low
TCGA-BR-4370	0	0	-3.84932	TCGA	Low
TCGA-VQ-A91Y	0.810959	1	-2.53938	TCGA	Low
TCGA-HU-A4GX	1.68767	0	1.2897	TCGA	High
TCGA-VQ-A8P8	2.58082	0	0.258224	TCGA	High
TCGA-VQ-A8PK	1.48767	1	-1.19645	TCGA	Low
TCGA-FP-8631	0.0465753	0	-1.78561	TCGA	Low
TCGA-HU-A4H2	1.07945	0	0.874421	TCGA	High
TCGA-HU-A4GJ	1.78082	0	0.519128	TCGA	High
TCGA-BR-8486	0	0	1.00882	TCGA	High
TCGA-IN-7806	3.03014	0	1.08875	TCGA	High
TCGA-HU-8238	0.126027	0	1.03761	TCGA	High
TCGA-IN-A6RL	1.11233	1	-0.0242838	TCGA	High
TCGA-VQ-A8P5	0.643836	1	0.574351	TCGA	High
TCGA-MX-A666	1.16986	0	0.930573	TCGA	High
TCGA-B7-A5TN	0.786301	0	-1.79896	TCGA	Low
TCGA-BR-7957	0.756164	1	-2.63477	TCGA	Low
TCGA-BR-4253	0.339726	1	2.45191	TCGA	High
TCGA-D7-8578	1.76164	0	-4.34248	TCGA	Low
TCGA-BR-8687	0.684932	1	-3.04365	TCGA	Low
TCGA-BR-6453	1.32877	0	0.109604	TCGA	High
TCGA-VQ-A91U	0.142466	1	2.44467	TCGA	High
TCGA-ZQ-A9CR	0.0657534	1	-0.564542	TCGA	Low
TCGA-VQ-A91Q	1.73425	1	-3.02658	TCGA	Low
TCGA-BR-8077	0.0575342	0	1.04144	TCGA	High
TCGA-RD-A8MV	10.1918	0	1.93337	TCGA	High
TCGA-D7-A6EY	0.953425	1	-0.35116	TCGA	Low
TCGA-RD-A8N1	9.6411	0	-1.6606	TCGA	Low
TCGA-FP-8210	0.419178	1	-0.702182	TCGA	Low
TCGA-CG-4442	0	0	2.69006	TCGA	High
TCGA-CD-A487	1.02466	0	1.11928	TCGA	High
TCGA-D7-A748	0.361644	1	-1.92002	TCGA	Low
TCGA-VQ-A8PF	0.208219	1	-0.57523	TCGA	Low
TCGA-BR-4257	0.805479	1	0.993098	TCGA	High
TCGA-BR-8371	0.983562	1	-0.158578	TCGA	Low
TCGA-R5-A7ZI	6.21096	0	3.34593	TCGA	High
TCGA-BR-8286	2.45205	0	0.0198045	TCGA	High
TCGA-HU-A4H4	1.9863	0	1.63318	TCGA	High
TCGA-BR-8364	1.84932	0	-1.94443	TCGA	Low
TCGA-IN-8462	1.56712	0	0.407926	TCGA	High
TCGA-HU-A4GU	0.547945	0	3.04687	TCGA	High
TCGA-BR-8059	1.20274	1	-0.411206	TCGA	Low
TCGA-D7-6525	1.11233	1	-0.544602	TCGA	Low
TCGA-CG-5717	0.580822	1	0.72443	TCGA	High
TCGA-BR-8485	0.767123	0	-2.41536	TCGA	Low
TCGA-CD-8531	1.04932	0	0.0324109	TCGA	High
TCGA-VQ-A8E0	1.53973	1	1.98143	TCGA	High
TCGA-CD-A4MG	0.547945	1	-0.101674	TCGA	Low
TCGA-BR-8366	0.0794521	0	0.1859	TCGA	High
TCGA-VQ-AA6D	1.4274	0	0.819302	TCGA	High
TCGA-D7-A6EV	0.936986	0	-0.46633	TCGA	Low
TCGA-F1-6177	0	0	1.52728	TCGA	High
TCGA-VQ-AA69	2.36712	0	-0.158719	TCGA	Low
TCGA-BR-6456	1.4411	1	-1.32448	TCGA	Low
TCGA-BR-7715	2.80274	0	-0.0671375	TCGA	High
TCGA-D7-8575	1.51781	1	0.694429	TCGA	High
TCGA-HU-A4GH	0.980822	0	0.838178	TCGA	High
TCGA-VQ-A8E2	3.6137	0	-2.00836	TCGA	Low
TCGA-BR-4363	0	0	-0.969413	TCGA	Low
TCGA-IN-A7NU	0.975342	0	0.590203	TCGA	High
TCGA-CG-4440	0.334247	1	0.565975	TCGA	High
TCGA-HU-A4G3	0.465753	0	-0.974572	TCGA	Low
TCGA-HU-A4HD	2.78356	0	0.158265	TCGA	High
TCGA-FP-A9TM	0.517808	0	1.47537	TCGA	High
TCGA-D7-6528	1.26849	0	3.12624	TCGA	High
TCGA-R5-A7ZF	0.709589	1	-0.379264	TCGA	Low
TCGA-VQ-AA6J	2.29589	0	2.2954	TCGA	High
TCGA-CG-4437	0.671233	0	-1.42196	TCGA	Low
TCGA-VQ-A8DT	4.06575	0	1.23635	TCGA	High
TCGA-CG-4436	0.665753	0	4.0136	TCGA	High
TCGA-VQ-A8PD	1.3589	1	0.414769	TCGA	High
TCGA-BR-7716	3.31507	0	-1.34997	TCGA	Low
TCGA-HU-A4GP	0.747945	0	1.87117	TCGA	High
TCGA-HU-8610	0.0630137	0	-2.03701	TCGA	Low
TCGA-CG-4443	2.49863	0	-0.858173	TCGA	Low
TCGA-VQ-AA68	3.63836	0	1.24818	TCGA	High
TCGA-D7-8576	1.22192	1	1.58114	TCGA	High
TCGA-CD-A4MH	1.01644	0	0.713123	TCGA	High
TCGA-BR-8677	2.2274	0	-0.879054	TCGA	Low
TCGA-VQ-A925	0.378082	1	0.360633	TCGA	High
TCGA-BR-6452	2.89041	0	-2.8834	TCGA	Low
TCGA-BR-8384	0.309589	0	-0.67991	TCGA	Low
TCGA-BR-7717	1.51233	1	-1.47485	TCGA	Low
TCGA-BR-4267	0.515068	1	2.03194	TCGA	High
TCGA-IN-A6RI	1.53151	0	0.941445	TCGA	High
TCGA-BR-7722	1.27671	1	0.461992	TCGA	High
TCGA-BR-4368	0	0	1.59997	TCGA	High
TCGA-BR-6457	1.13973	0	-3.27269	TCGA	Low
TCGA-CG-4301	0.252055	0	-0.535155	TCGA	Low
TCGA-CG-5720	0.0821918	1	1.07761	TCGA	High
TCGA-BR-8686	1.73973	1	-0.203189	TCGA	Low
TCGA-CD-5800	1.09589	0	0.154947	TCGA	High
TCGA-VQ-A8PJ	0.224658	1	-2.25079	TCGA	Low
TCGA-D7-5577	2.14247	1	0.344286	TCGA	High
TCGA-RD-A8MW	3.1589	1	-0.285664	TCGA	Low
TCGA-D7-A6F0	1.85753	0	-1.25998	TCGA	Low
TCGA-D7-A4YX	3.03562	0	-1.67244	TCGA	Low
TCGA-IN-A7NT	0.884932	0	-0.3456	TCGA	Low
TCGA-CD-8524	1.06301	0	-2.80407	TCGA	Low
TCGA-HU-A4GD	1.89589	0	2.84129	TCGA	High
TCGA-IN-A6RS	1.04932	0	2.10572	TCGA	High
TCGA-BR-4294	0	0	2.83658	TCGA	High
TCGA-RD-A7BT	0.717808	1	2.98489	TCGA	High
TCGA-BR-6566	2.73151	0	2.08658	TCGA	High
TCGA-D7-6524	1.48767	0	-0.0522272	TCGA	High
TCGA-BR-8592	0.523288	1	-0.997093	TCGA	Low
TCGA-VQ-A91D	0.975342	1	-0.213078	TCGA	Low
TCGA-IN-A6RR	0.561644	1	0.919127	TCGA	High
TCGA-VQ-A91X	0.791781	1	5.91758	TCGA	High
TCGA-BR-6565	0.764384	1	1.75498	TCGA	High
TCGA-BR-8373	1.23288	0	-1.62997	TCGA	Low
TCGA-CD-8533	1.28219	0	-0.582707	TCGA	Low
TCGA-IN-AB1V	1.31233	0	2.16379	TCGA	High
TCGA-VQ-A8DV	1.10411	1	1.23659	TCGA	High
TCGA-RD-A8N2	9.69863	0	1.90124	TCGA	High
TCGA-HU-A4GY	0.0219178	0	0.907407	TCGA	High
TCGA-KB-A6F7	5.30137	0	2.12029	TCGA	High
TCGA-CG-5718	3	1	-0.304693	TCGA	Low
TCGA-BR-7707	2.9863	0	-0.570446	TCGA	Low
TCGA-D7-6822	1.0274	0	-0.981369	TCGA	Low
TCGA-VQ-A922	0.753425	1	-1.76844	TCGA	Low
TCGA-VQ-A8P3	3.10137	0	-0.511162	TCGA	Low
TCGA-VQ-A927	0.547945	1	0.23302	TCGA	High
TCGA-CD-5799	1.08493	0	-1.07426	TCGA	Low
TCGA-D7-6521	1.54521	0	-2.5531	TCGA	Low
TCGA-VQ-A94R	3.54521	1	-1.59807	TCGA	Low
TCGA-FP-8099	1.42192	0	-4.32094	TCGA	Low
TCGA-BR-8484	2.09863	1	-1.93744	TCGA	Low
TCGA-BR-7196	1.82466	0	-2.24941	TCGA	Low
TCGA-D7-A747	0.69863	1	-0.213648	TCGA	Low
TCGA-R5-A805	0.769863	1	-0.280149	TCGA	Low
TCGA-RD-A8N0	3.3863	0	-0.0531296	TCGA	High
TCGA-CG-4444	3.92055	0	0.645851	TCGA	High
TCGA-VQ-A91Z	4.63014	0	-3.03607	TCGA	Low
TCGA-CG-4305	1.32877	0	-1.35056	TCGA	Low
TCGA-D7-8574	1.43288	0	-0.643795	TCGA	Low
TCGA-BR-8367	2.19452	1	-2.86157	TCGA	Low
TCGA-BR-8296	1.29863	1	-0.835678	TCGA	Low
TCGA-CG-5724	1.00274	1	1.24784	TCGA	High
TCGA-BR-4279	0.79726	1	-0.598986	TCGA	Low
TCGA-HU-8602	1.86027	0	1.08812	TCGA	High
TCGA-BR-4187	0.386301	1	0.201176	TCGA	High
TCGA-CG-4477	2.58082	0	1.17083	TCGA	High
TCGA-CG-4466	1.58082	0	3.31133	TCGA	High
TCGA-HU-A4H0	0.175342	0	3.32702	TCGA	High
TCGA-VQ-A8PQ	1.30411	1	-1.16196	TCGA	Low
TCGA-RD-A8N6	0.745205	1	-0.44953	TCGA	Low
TCGA-CG-4438	4.50685	0	1.34074	TCGA	High
TCGA-BR-8483	0.449315	0	1.97576	TCGA	High
TCGA-RD-A8N4	5.94795	0	0.556466	TCGA	High
TCGA-D7-6527	0.854795	1	0.597463	TCGA	High
TCGA-D7-A6F2	1.30411	0	0.466504	TCGA	High
TCGA-BR-A4CS	0.123288	1	1.97613	TCGA	High
TCGA-HU-A4H6	1.76438	0	1.77204	TCGA	High
TCGA-BR-8297	0.616438	0	-0.69034	TCGA	Low
TCGA-BR-A4QL	1.34521	1	1.46975	TCGA	High
TCGA-BR-6458	1.61096	1	-0.921685	TCGA	Low
TCGA-CG-5721	0.50137	0	2.19709	TCGA	High
TCGA-CG-4441	1.16712	1	-4.15108	TCGA	Low
TCGA-FP-8211	1.13151	0	0.15136	TCGA	High
TCGA-BR-8058	3.10411	0	-2.27201	TCGA	Low
TCGA-VQ-A92D	5.56712	0	-0.606053	TCGA	Low
TCGA-CG-4462	0	1	-1.11542	TCGA	Low
TCGA-ZA-A8F6	1.43836	0	1.59784	TCGA	High
TCGA-VQ-A91S	2.73973	0	1.98652	TCGA	High
TCGA-BR-A4J8	1.12603	0	0.736177	TCGA	High
TCGA-BR-8369	1.16986	0	0.550266	TCGA	High
TCGA-D7-A74A	1.66301	0	0.705818	TCGA	High
TCGA-B7-5818	0.975342	0	1.03866	TCGA	High
TCGA-FP-7998	1.85753	0	-0.369425	TCGA	Low
TCGA-BR-8678	2.06575	0	0.941024	TCGA	High
TCGA-HU-A4GF	2.15068	0	1.67154	TCGA	High
TCGA-BR-6709	1.0137	1	-2.0487	TCGA	Low
TCGA-BR-4361	0	0	-2.20976	TCGA	Low
TCGA-IN-7808	0.287671	1	0.764637	TCGA	High
TCGA-BR-8284	0.671233	1	-3.61626	TCGA	Low
TCGA-CG-4465	0.750685	1	3.80303	TCGA	High
TCGA-VQ-AA64	1.53425	1	-1.98357	TCGA	Low
TCGA-BR-7704	2.93699	0	0.817737	TCGA	High
TCGA-CG-4475	1.91507	0	-1.17568	TCGA	Low
TCGA-B7-A5TJ	0.917808	0	0.945025	TCGA	High
TCGA-VQ-A8PU	2.27945	1	1.36995	TCGA	High
TCGA-RD-A8N9	2.96712	0	-3.34771	TCGA	Low
TCGA-BR-8060	0.953425	1	-2.18673	TCGA	Low
TCGA-BR-8368	0.358904	0	1.23218	TCGA	High
TCGA-HU-A4G9	2.01644	0	2.55997	TCGA	High
TCGA-CG-5723	6.83836	0	1.55012	TCGA	High
TCGA-D7-8570	2.06027	0	-0.0430365	TCGA	High
TCGA-IN-A6RN	1.6274	0	0.336126	TCGA	High
TCGA-BR-4256	0.778082	1	0.37836	TCGA	High
TCGA-EQ-8122	0.665753	1	-0.357362	TCGA	Low
TCGA-HU-A4G2	2.02466	0	0.328124	TCGA	High
TCGA-BR-8679	0	0	0.853453	TCGA	High
TCGA-BR-8289	0.221918	1	-2.47769	TCGA	Low
TCGA-CG-5726	2.4137	1	1.04702	TCGA	High
TCGA-BR-A4J9	0.0383562	0	-0.610423	TCGA	Low
TCGA-CG-5716	0	0	0.739373	TCGA	High
TCGA-CG-5734	0.665753	1	1.5658	TCGA	High
TCGA-BR-8291	1.66301	1	-2.7763	TCGA	Low
TCGA-HU-8608	1.75616	0	0.636845	TCGA	High
TCGA-HU-A4H8	0.739726	0	2.2213	TCGA	High
TCGA-BR-A4PF	0.0958904	0	3.80675	TCGA	High
TCGA-BR-6705	2.13425	1	-2.48119	TCGA	Low
TCGA-VQ-A928	0.476712	1	-2.60068	TCGA	Low
TCGA-KB-A93J	3.07945	0	0.925751	TCGA	High
TCGA-CD-A48A	1.03562	0	0.856419	TCGA	High
TCGA-VQ-A94O	1.75342	1	-0.997123	TCGA	Low
TCGA-RD-A8NB	1.40548	1	0.103555	TCGA	High
TCGA-BR-8591	2.34521	0	1.08124	TCGA	High
TCGA-VQ-AA6G	2.16986	1	0.703377	TCGA	High
TCGA-R5-A7ZR	0.506849	1	1.56133	TCGA	High
TCGA-BR-4201	2.57534	1	-1.4691	TCGA	Low
TCGA-BR-A44U	1.15616	1	2.29021	TCGA	High
TCGA-CG-4476	0	0	-0.0777705	TCGA	High
TCGA-CG-4306	0.00273973	1	1.1255	TCGA	High
GSM2235556	5.75342	1	-1.63519	GSE84426	Low
GSM2235557	1.89041	1	-3.08851	GSE84426	Low
GSM2235558	1.9726	1	-1.62484	GSE84426	Low
GSM2235559	4.84932	1	-2.24475	GSE84426	Low
GSM2235560	0.986301	1	-3.9597	GSE84426	Low
GSM2235561	6.9863	0	-1.66169	GSE84426	Low
GSM2235562	1.47945	1	0.281894	GSE84426	High
GSM2235563	1.15068	1	0.868587	GSE84426	High
GSM2235564	6.90411	0	3.63388	GSE84426	High
GSM2235565	5.34247	1	-0.89105	GSE84426	Low
GSM2235566	0.90411	1	-2.95252	GSE84426	Low
GSM2235567	3.53425	1	-1.52082	GSE84426	Low
GSM2235568	6.73973	0	2.98832	GSE84426	High
GSM2235569	6.73973	0	0.131492	GSE84426	High
GSM2235570	6.65753	0	-0.49242	GSE84426	Low
GSM2235571	6.57534	0	1.47269	GSE84426	High
GSM2235572	7.06849	0	-2.93806	GSE84426	Low
GSM2235573	6.73973	0	-1.361	GSE84426	Low
GSM2235574	0.90411	1	1.28295	GSE84426	High
GSM2235575	7.06849	0	1.56652	GSE84426	High
GSM2235576	0.328767	1	1.71802	GSE84426	High
GSM2235577	1.56164	1	0.359071	GSE84426	High
GSM2235578	1.72603	1	1.64071	GSE84426	High
GSM2235579	1.39726	1	0.255258	GSE84426	High
GSM2235580	2.05479	1	-0.269064	GSE84426	Low
GSM2235582	1.06849	1	1.74357	GSE84426	High
GSM2235584	4.68493	1	1.47294	GSE84426	High
GSM2235585	1.89041	1	1.04614	GSE84426	High
GSM2235586	6.32877	0	-0.835883	GSE84426	Low
GSM2235587	5.26027	1	0.78018	GSE84426	High
GSM2235588	4.19178	1	-1.87639	GSE84426	Low
GSM2235589	6.32877	0	3.30563	GSE84426	High
GSM2235593	6.32877	0	2.80791	GSE84426	High
GSM2235595	1.23288	1	-0.124631	GSE84426	Low
GSM2235596	6.16438	0	0.435202	GSE84426	High
GSM2235597	6.90411	0	0.567905	GSE84426	High
GSM2235598	1.72603	1	0.77672	GSE84426	High
GSM2235599	6.57534	0	-0.547063	GSE84426	Low
GSM2235600	6.08219	0	-1.25337	GSE84426	Low
GSM2235601	6.08219	0	-3.04958	GSE84426	Low
GSM2235602	6.73973	0	-1.42847	GSE84426	Low
GSM2235603	6.57534	0	0.201132	GSE84426	High
GSM2235604	6.08219	0	-2.04722	GSE84426	Low
GSM2235605	5.50685	1	-0.630332	GSE84426	Low
GSM2235606	6	0	0.196936	GSE84426	High
GSM2235607	0.493151	1	0.193646	GSE84426	High
GSM2235608	6.57534	0	3.02703	GSE84426	High
GSM2235609	0.657534	1	-0.935473	GSE84426	Low
GSM2235610	1.89041	1	-2.22194	GSE84426	Low
GSM2235611	0.657534	1	2.00336	GSE84426	High
GSM2235612	2.38356	1	-1.68007	GSE84426	Low
GSM2235613	6.82192	0	2.67709	GSE84426	High
GSM2235614	6.32877	0	0.607797	GSE84426	High
GSM2235615	6.32877	0	0.197863	GSE84426	High
GSM2235616	0.0821918	1	-2.11255	GSE84426	Low
GSM2235617	5.83562	0	1.15236	GSE84426	High
GSM2235618	5.83562	0	1.81304	GSE84426	High
GSM2235619	5.75342	0	0.997275	GSE84426	High
GSM2235620	5.83562	0	-1.56073	GSE84426	Low
GSM2235621	2.71233	1	0.295194	GSE84426	High
GSM2235622	1.89041	1	-0.67037	GSE84426	Low
GSM2235623	1.72603	1	0.130796	GSE84426	High
GSM2235624	6.32877	0	2.08584	GSE84426	High
GSM2235625	5.75342	0	1.20049	GSE84426	High
GSM2235626	6.32877	0	-1.68265	GSE84426	Low
GSM2235627	5.75342	0	0.623785	GSE84426	High
GSM2235628	6.08219	0	-2.27831	GSE84426	Low
GSM2235629	2.9589	1	-0.361965	GSE84426	Low
GSM2235630	5.75342	0	-2.34737	GSE84426	Low
GSM2235631	5.67123	0	0.0674756	GSE84426	High
GSM2235632	6.24658	0	1.92797	GSE84426	High
GSM2235633	1.39726	1	-1.32748	GSE84426	Low
GSM2235634	6.08219	0	2.0001	GSE84426	High
GSM2235635	5.91781	0	0.553206	GSE84426	High
GSM2235636	5.67123	0	0.319391	GSE84426	High
GSM2235637	5.58904	0	2.44676	GSE84426	High
GSM2235695	9.94521	0	3.14769	GSE84433	High
GSM2235696	8.87671	0	1.51137	GSE84433	High
GSM2235697	3.20548	1	-1.05331	GSE84433	Low
GSM2235698	1.89041	1	-0.369625	GSE84433	Low
GSM2235699	1.89041	1	-0.899023	GSE84433	Low
GSM2235700	9.61644	0	-1.14384	GSE84433	Low
GSM2235701	8.87671	0	1.18361	GSE84433	High
GSM2235702	1.47945	1	-3.02894	GSE84433	Low
GSM2235703	3.53425	1	-0.26682	GSE84433	Low
GSM2235704	8.9589	0	1.75665	GSE84433	High
GSM2235705	9.36986	0	1.74699	GSE84433	High
GSM2235706	0.164384	1	-0.694943	GSE84433	Low
GSM2235707	9.53425	0	1.76788	GSE84433	High
GSM2235708	8.9589	0	1.66088	GSE84433	High
GSM2235709	8.87671	0	0.594372	GSE84433	High
GSM2235710	1.06849	1	-0.629199	GSE84433	Low
GSM2235711	1.56164	1	-0.020345	GSE84433	High
GSM2235712	8.87671	0	1.84643	GSE84433	High
GSM2235713	9.53425	1	-0.234911	GSE84433	Low
GSM2235714	3.78082	1	2.69453	GSE84433	High
GSM2235715	9.69863	0	2.02341	GSE84433	High
GSM2235716	8.54795	1	0.0200947	GSE84433	High
GSM2235717	0.246575	1	-2.35641	GSE84433	Low
GSM2235718	9.78082	0	-1.35055	GSE84433	Low
GSM2235719	0.0821918	1	1.06906	GSE84433	High
GSM2235720	9.78082	0	0.949633	GSE84433	High
GSM2235721	9.78082	0	-1.36091	GSE84433	Low
GSM2235722	2.9589	1	-1.27597	GSE84433	Low
GSM2235723	9.69863	0	0.546119	GSE84433	High
GSM2235724	0.821918	1	-1.92766	GSE84433	Low
GSM2235725	10.0274	0	1.02356	GSE84433	High
GSM2235726	0.0821918	1	0.551496	GSE84433	High
GSM2235727	9.69863	0	0.495383	GSE84433	High
GSM2235728	2.87671	1	0.390524	GSE84433	High
GSM2235729	0.410959	1	-1.12896	GSE84433	Low
GSM2235730	4.0274	1	2.19375	GSE84433	High
GSM2235731	9.69863	0	4.1518	GSE84433	High
GSM2235732	9.69863	0	0.710592	GSE84433	High
GSM2235733	11.8356	0	-1.20013	GSE84433	Low
GSM2235734	11.8356	0	-1.93026	GSE84433	Low
GSM2235735	11.9178	0	0.0487776	GSE84433	High
GSM2235736	0.739726	1	0.153543	GSE84433	High
GSM2235737	3.69863	1	0.829568	GSE84433	High
GSM2235738	12.5753	0	1.46701	GSE84433	High
GSM2235739	1.15068	1	0.391993	GSE84433	High
GSM2235740	0.328767	1	0.924431	GSE84433	High
GSM2235741	10.4384	0	-2.92475	GSE84433	Low
GSM2235742	0.246575	1	0.656064	GSE84433	High
GSM2235743	0.328767	1	-1.27516	GSE84433	Low
GSM2235744	4.0274	1	-0.549771	GSE84433	Low
GSM2235745	8.71233	0	-1.38489	GSE84433	Low
GSM2235746	9.12329	0	-1.42877	GSE84433	Low
GSM2235747	0.986301	1	0.222918	GSE84433	High
GSM2235748	0.164384	1	-2.99677	GSE84433	Low
GSM2235749	3.20548	1	1.14954	GSE84433	High
GSM2235750	0.575342	1	0.0691093	GSE84433	High
GSM2235751	8.30137	0	2.5702	GSE84433	High
GSM2235752	12.2466	0	3.27858	GSE84433	High
GSM2235753	2.54795	1	-1.29045	GSE84433	Low
GSM2235754	11.3425	0	-0.232205	GSE84433	Low
GSM2235755	7.15068	1	0.0438114	GSE84433	High
GSM2235756	11.5068	0	-0.364249	GSE84433	Low
GSM2235757	3.28767	1	0.199503	GSE84433	High
GSM2235758	1.06849	1	2.87762	GSE84433	High
GSM2235759	0.986301	1	-4.01867	GSE84433	Low
GSM2235760	1.64384	1	-0.974176	GSE84433	Low
GSM2235761	11.0137	0	-2.27787	GSE84433	Low
GSM2235762	3.20548	1	0.703815	GSE84433	High
GSM2235763	8.9589	1	0.0282603	GSE84433	High
GSM2235764	0.739726	1	-1.44983	GSE84433	Low
GSM2235765	11.3425	0	-1.09151	GSE84433	Low
GSM2235766	1.23288	1	0.326452	GSE84433	High
GSM2235767	1.47945	1	-0.858318	GSE84433	Low
GSM2235768	11.8356	0	2.13079	GSE84433	High
GSM2235769	1.80822	1	-0.933552	GSE84433	Low
GSM2235770	0.575342	1	1.31757	GSE84433	High
GSM2235771	11.7534	0	0.0851936	GSE84433	High
GSM2235772	4.93151	1	0.0919674	GSE84433	High
GSM2235773	1.39726	1	-0.943075	GSE84433	Low
GSM2235774	0.986301	1	-1.78868	GSE84433	Low
GSM2235775	9.86301	0	-1.13715	GSE84433	Low
GSM2235776	1.64384	1	-1.61109	GSE84433	Low
GSM2235777	9.45205	1	-0.382024	GSE84433	Low
GSM2235778	1.89041	1	0.480266	GSE84433	High
GSM2235779	4.0274	1	2.78424	GSE84433	High
GSM2235780	0	1	-2.26934	GSE84433	Low
GSM2235781	9.45205	0	-0.19349	GSE84433	Low
GSM2235782	0.328767	1	-1.48625	GSE84433	Low
GSM2235783	6.16438	1	-0.458568	GSE84433	Low
GSM2235784	8.46575	1	2.71361	GSE84433	High
GSM2235785	9.36986	0	1.70043	GSE84433	High
GSM2235786	8.87671	0	-2.99252	GSE84433	Low
GSM2235787	2.05479	1	-2.21269	GSE84433	Low
GSM2235788	9.61644	0	0.819707	GSE84433	High
GSM2235789	3.0411	1	2.07202	GSE84433	High
GSM2235790	9.78082	0	-0.282548	GSE84433	Low
GSM2235791	2.05479	1	-1.90599	GSE84433	Low
GSM2235792	7.56164	1	-0.58462	GSE84433	Low
GSM2235793	7.15068	1	-1.30114	GSE84433	Low
GSM2235794	9.94521	0	-0.628635	GSE84433	Low
GSM2235795	9.94521	0	-0.387574	GSE84433	Low
GSM2235796	3.61644	1	1.02359	GSE84433	High
GSM2235797	9.45205	0	3.59065	GSE84433	High
GSM2235798	2.05479	1	2.84495	GSE84433	High
GSM2235799	0.986301	1	-0.0382487	GSE84433	High
GSM2235800	9.36986	0	0.402063	GSE84433	High
GSM2235801	9.28767	0	-0.196492	GSE84433	Low
GSM2235802	8.71233	0	0.208329	GSE84433	High
GSM2235803	8.79452	0	1.41645	GSE84433	High
GSM2235804	9.36986	0	-1.24582	GSE84433	Low
GSM2235805	0.410959	1	-3.0387	GSE84433	Low
GSM2235806	8.30137	1	0.504412	GSE84433	High
GSM2235807	2.71233	1	0.953729	GSE84433	High
GSM2235808	1.89041	1	-0.293351	GSE84433	Low
GSM2235809	12	0	1.61216	GSE84433	High
GSM2235810	0.575342	1	0.0539182	GSE84433	High
GSM2235811	0.986301	1	-1.07506	GSE84433	Low
GSM2235812	2.79452	1	-0.641673	GSE84433	Low
GSM2235813	2.13699	1	1.13522	GSE84433	High
GSM2235814	9.28767	0	0.0367437	GSE84433	High
GSM2235815	9.28767	0	3.1851	GSE84433	High
GSM2235816	0.328767	1	1.47025	GSE84433	High
GSM2235817	4.52055	1	-1.02492	GSE84433	Low
GSM2235818	0.821918	1	1.41707	GSE84433	High
GSM2235819	1.72603	1	-0.180745	GSE84433	Low
GSM2235820	1.9726	1	-1.62667	GSE84433	Low
GSM2235821	9.20548	0	-0.172099	GSE84433	Low
GSM2235822	9.20548	0	1.30398	GSE84433	High
GSM2235823	0.739726	1	-2.52121	GSE84433	Low
GSM2235824	6.49315	1	-3.06208	GSE84433	Low
GSM2235825	1.89041	1	-3.25401	GSE84433	Low
GSM2235826	0.90411	1	-0.290831	GSE84433	Low
GSM2235827	3.53425	1	-0.886066	GSE84433	Low
GSM2235828	8.79452	0	-0.073418	GSE84433	High
GSM2235829	8.9589	0	4.13545	GSE84433	High
GSM2235830	8.05479	0	1.22925	GSE84433	High
GSM2235831	3.20548	1	2.27345	GSE84433	High
GSM2235837	9.28767	0	0.67064	GSE84433	High
GSM2235838	0.328767	1	-3.66496	GSE84433	Low
GSM2235839	8.30137	1	2.10302	GSE84433	High
GSM2235840	7.56164	1	1.10313	GSE84433	High
GSM2235841	1.31507	1	1.24011	GSE84433	High
GSM2235842	1.15068	1	0.00302593	GSE84433	High
GSM2235843	1.06849	1	-0.949604	GSE84433	Low
GSM2235844	8.38356	0	3.28814	GSE84433	High
GSM2235845	2.54795	1	2.2968	GSE84433	High
GSM2235846	7.56164	1	0.251157	GSE84433	High
GSM2235847	9.12329	0	-0.544685	GSE84433	Low
GSM2235848	3.28767	1	-4.23263	GSE84433	Low
GSM2235849	0.0821918	1	-3.35203	GSE84433	Low
GSM2235850	9.53425	0	-1.40862	GSE84433	Low
GSM2235851	7.64384	1	1.13296	GSE84433	High
GSM2235852	3.94521	1	-1.51315	GSE84433	Low
GSM2235853	9.12329	0	2.11516	GSE84433	High
GSM2235854	9.12329	0	-1.17314	GSE84433	Low
GSM2235855	9.0411	0	0.111662	GSE84433	High
GSM2235862	6.9863	1	-0.248208	GSE84433	Low
GSM2235863	10.9315	0	-2.67233	GSE84433	Low
GSM2235864	0.986301	1	-0.617314	GSE84433	Low
GSM2235865	2.71233	1	1.22132	GSE84433	High
GSM2235866	10.6027	0	-1.19006	GSE84433	Low
GSM2235867	10.274	0	0.0176282	GSE84433	High
GSM2235878	10.274	0	0.259086	GSE84433	High
GSM2235879	0.493151	1	-1.77682	GSE84433	Low
GSM2235880	1.39726	1	1.28967	GSE84433	High
GSM2235881	10.274	0	1.17749	GSE84433	High
GSM2235882	1.06849	1	-0.70778	GSE84433	Low
GSM2235883	1.56164	1	-1.47801	GSE84433	Low
GSM2235884	10.3562	0	-0.570952	GSE84433	Low
GSM2235885	10.1918	0	-0.77692	GSE84433	Low
GSM2235886	4.19178	1	-0.0458587	GSE84433	High
GSM2235887	6.49315	1	-0.965376	GSE84433	Low
GSM2235888	5.58904	1	-0.852579	GSE84433	Low
GSM2235889	7.64384	1	1.47566	GSE84433	High
GSM2235899	2.79452	1	-0.910232	GSE84433	Low
GSM2235900	10.4384	0	0.829794	GSE84433	High
GSM2235901	4.76712	1	0.623534	GSE84433	High
GSM2235902	2.79452	1	-1.31011	GSE84433	Low
GSM2235903	10.7671	0	-1.13613	GSE84433	Low
GSM2235904	1.72603	1	-2.80522	GSE84433	Low
GSM2235905	0.164384	1	-0.590432	GSE84433	Low
GSM2235906	9.86301	1	1.28012	GSE84433	High
GSM2235907	10.1096	0	-0.660543	GSE84433	Low
GSM2235908	10.1096	0	-1.19169	GSE84433	Low
GSM2235909	1.47945	1	2.12751	GSE84433	High
GSM2235910	11.4247	0	-2.29453	GSE84433	Low
GSM2235921	11.4247	0	2.59604	GSE84433	High
GSM2235922	11.3425	0	1.22481	GSE84433	High
GSM2235923	1.15068	1	-0.140249	GSE84433	Low
GSM2235924	11.0959	0	-0.461258	GSE84433	Low
GSM2235925	11.0137	0	2.25087	GSE84433	High
GSM2235926	11.5068	0	-1.52548	GSE84433	Low
GSM2235927	0	1	0.73485	GSE84433	High
GSM2235928	10.8493	0	2.08492	GSE84433	High
GSM2235929	4.93151	1	-2.29557	GSE84433	Low
GSM2235930	6.08219	1	-0.819823	GSE84433	Low
GSM2235931	10.8493	0	0.405686	GSE84433	High
GSM2235932	4.84932	0	-1.04362	GSE84433	Low
GSM2235933	3.36986	0	-3.36783	GSE84433	Low
GSM2235934	3.86301	0	1.59306	GSE84433	High
GSM2235935	1.56164	1	-1.44801	GSE84433	Low
GSM2235936	3.45205	0	0.939719	GSE84433	High
GSM2235937	3.0411	0	1.33824	GSE84433	High
GSM2235938	7.56164	0	1.40031	GSE84433	High
GSM2235939	3.69863	0	-1.42902	GSE84433	Low
GSM2235940	2.71233	1	1.36983	GSE84433	High
GSM2235941	3.36986	0	3.46414	GSE84433	High
GSM2235942	3.45205	0	-0.369259	GSE84433	Low
GSM2235943	10.4384	0	-0.0527115	GSE84433	High
GSM2235944	10.3562	0	-1.55825	GSE84433	Low
GSM2235945	3.0411	1	-2.56061	GSE84433	Low
GSM2235946	10.7671	0	0.91219	GSE84433	High
GSM2235947	10.6027	0	1.51036	GSE84433	High
GSM2235948	10.8493	0	-2.0741	GSE84433	Low
GSM2235949	10.8493	0	0.230035	GSE84433	High
GSM2235950	10.5205	0	0.0753457	GSE84433	High
GSM2235951	0.410959	1	-1.15341	GSE84433	Low
GSM2235952	0.0821918	1	-0.493281	GSE84433	Low
GSM2235953	0.821918	1	-0.873408	GSE84433	Low
GSM2235954	12.2466	0	-1.2248	GSE84433	Low
GSM2235955	12.2466	0	-1.59081	GSE84433	Low
GSM2235956	11.0959	1	-3.22407	GSE84433	Low
GSM2235957	12.1644	0	2.95297	GSE84433	High
GSM2235958	12.4932	0	-1.93517	GSE84433	Low
GSM2235959	11.8356	0	3.29414	GSE84433	High
GSM2235960	11.6712	0	0.785888	GSE84433	High
GSM2235961	11.589	0	-2.37923	GSE84433	Low
GSM2235962	2.21918	1	-1.15011	GSE84433	Low
GSM2235963	2.21918	1	1.65424	GSE84433	High
GSM2235964	1.80822	1	-0.274934	GSE84433	Low
GSM2235965	5.17808	1	-2.45743	GSE84433	Low
GSM2235966	2.71233	0	-2.98274	GSE84433	Low
GSM2235967	0.821918	1	1.22609	GSE84433	High
GSM2235968	4.84932	0	3.8253	GSE84433	High
GSM2235969	5.26027	0	-1.05547	GSE84433	Low
GSM2235970	1.47945	1	-1.92701	GSE84433	Low
GSM2235971	5.17808	0	-3.3096	GSE84433	Low
GSM2235972	4.68493	0	0.0168782	GSE84433	High
GSM2235973	5.09589	0	-2.68994	GSE84433	Low
GSM2235974	0.986301	1	-0.730703	GSE84433	Low
GSM2235975	5.0137	0	-0.0158152	GSE84433	High
GSM2235976	4.52055	0	2.70658	GSE84433	High
GSM2235977	0.575342	1	-1.63864	GSE84433	Low
GSM2235978	2.79452	0	0.0736629	GSE84433	High
GSM2235979	3.45205	0	0.273374	GSE84433	High
GSM2235980	0.493151	1	-1.41579	GSE84433	Low
GSM2235981	2.9589	0	-0.738848	GSE84433	Low
GSM2235982	3.0411	0	0.504099	GSE84433	High
GSM2235983	3.12329	0	-0.333284	GSE84433	Low
GSM2235984	0.657534	1	1.41456	GSE84433	High
GSM2235985	2.87671	0	-0.895677	GSE84433	Low
GSM2235986	2.87671	0	0.663241	GSE84433	High
GSM2235987	2.87671	0	1.24885	GSE84433	High
GSM2235988	5.75342	0	0.489949	GSE84433	High
GSM2235991	2.63014	1	-1.92834	GSE84433	Low
GSM2235992	10.5205	0	-0.31973	GSE84433	Low
GSM2235993	10.3562	0	0.114537	GSE84433	High
GSM2235994	10.1096	0	-0.726944	GSE84433	Low
GSM2235995	0.821918	1	1.87532	GSE84433	High
GSM2235996	0.493151	1	-3.97546	GSE84433	Low
GSM2235997	10.5205	0	0.90823	GSE84433	High
GSM2235998	10.0274	0	-0.959648	GSE84433	Low
GSM2235999	7.80822	1	2.01475	GSE84433	High
GSM2236000	10.0274	0	-0.696257	GSE84433	Low
GSM2236001	10.1918	0	0.0248795	GSE84433	High
GSM2236002	10.6027	0	1.16063	GSE84433	High
GSM2236003	10.3562	0	-1.77832	GSE84433	Low
GSM2236004	3.78082	1	1.46394	GSE84433	High
GSM2236005	0.739726	1	-0.274387	GSE84433	Low
GSM2236006	1.9726	1	0.0677476	GSE84433	High
GSM2236007	1.72603	1	1.79523	GSE84433	High
GSM2236008	2.46575	1	-1.51304	GSE84433	Low
GSM2236009	2.21918	1	-0.454974	GSE84433	Low
GSM2236010	3.12329	1	2.8022	GSE84433	High
GSM2236011	2.13699	1	-0.97085	GSE84433	Low
GSM2236012	0.246575	1	-0.0214414	GSE84433	High
GSM2236013	4.35616	1	1.417	GSE84433	High
GSM2236014	8.63014	1	1.60771	GSE84433	High
GSM2236015	9.0411	0	-0.125084	GSE84433	Low
GSM2236016	1.64384	1	1.083	GSE84433	High
GSM2236017	1.39726	1	0.74123	GSE84433	High
GSM2236018	9.53425	0	1.64936	GSE84433	High
GSM2236019	7.56164	1	1.27536	GSE84433	High
GSM2236020	8.9589	0	2.45264	GSE84433	High
GSM2236021	4.19178	1	-2.43765	GSE84433	Low
GSM2236022	8.54795	0	0.0440226	GSE84433	High
GSM2236023	8.87671	0	2.27823	GSE84433	High
GSM2236024	8.46575	0	0.248725	GSE84433	High
GSM2236025	3.20548	1	0.0365437	GSE84433	High
GSM2236026	5.26027	1	-0.467968	GSE84433	Low
GSM2236027	10.1918	0	0.803991	GSE84433	High
GSM2236028	7.80822	1	1.60044	GSE84433	High
GSM2236029	11.3425	0	1.79019	GSE84433	High
GSM2236030	11.3425	0	-1.10903	GSE84433	Low
GSM2236031	11.0137	0	-1.30279	GSE84433	Low
GSM2236032	11.0137	0	0.336985	GSE84433	High
GSM2236033	9.86301	0	0.480401	GSE84433	High
GSM2236034	10.0274	0	-0.380983	GSE84433	Low
GSM2236036	3.36986	0	0.776899	GSE84433	High
GSM2236037	3.36986	0	-0.577217	GSE84433	Low
GSM2236038	3.28767	0	-2.98765	GSE84433	Low
GSM2236039	3.45205	0	-1.17487	GSE84433	Low
GSM2236040	3.0411	0	3.54935	GSE84433	High
GSM2236041	3.36986	0	1.17522	GSE84433	High
GSM2236042	3.0411	0	1.01293	GSE84433	High
GSM2236043	3.28767	0	0.170317	GSE84433	High
GSM2236044	11.589	0	1.02905	GSE84433	High
GSM2236045	13.2329	0	3.57939	GSE84433	High
GSM2236046	2.87671	1	2.68081	GSE84433	High
GSM2236047	4.0274	1	-2.0115	GSE84433	Low
GSM2236048	8.38356	0	5.4877	GSE84433	High
GSM2236049	2.71233	1	0.0835424	GSE84433	High
GSM2236050	8.30137	0	1.57158	GSE84433	High
GSM2236051	3.12329	1	-0.2721	GSE84433	Low
GSM2236052	9.53425	0	1.08584	GSE84433	High
GSM2236053	1.80822	1	-1.35116	GSE84433	Low
GSM2236054	6.49315	1	-2.26226	GSE84433	Low
GSM2236055	10.9315	0	1.88256	GSE84433	High
GSM2236056	10.5205	0	3.58396	GSE84433	High
GSM2236057	3.0411	1	-1.51912	GSE84433	Low
GSM2236058	11.1781	0	-0.792483	GSE84433	Low
GSM2236059	11.2603	0	-1.5399	GSE84433	Low
GSM2236060	3.0411	1	-0.769362	GSE84433	Low
GSM2236061	10.6027	0	-0.397858	GSE84433	Low
GSM2236062	10.6027	0	-0.30116	GSE84433	Low
GSM2236063	10.7671	0	0.25613	GSE84433	High
GSM2236064	6.32877	1	1.39872	GSE84433	High
GSM2236065	9.78082	0	-0.0655815	GSE84433	High
GSM2236066	10.4384	0	-2.09792	GSE84433	Low
GSM2236067	1.39726	1	2.45015	GSE84433	High
GSM2236068	3.45205	1	-1.06466	GSE84433	Low
GSM2236069	9.45205	0	0.668243	GSE84433	High
GSM2236070	10.1918	0	4.56838	GSE84433	High
GSM2236071	9.36986	0	1.56418	GSE84433	High
GSM2236072	2.71233	1	-1.43937	GSE84433	Low
GSM2236073	1.80822	1	-3.78424	GSE84433	Low
GSM2236074	11.7534	0	2.05805	GSE84433	High
GSM2236075	3.20548	1	-1.68701	GSE84433	Low
GSM2236076	2.87671	0	-1.10789	GSE84433	Low
GSM2236077	3.12329	0	2.84982	GSE84433	High
GSM2236078	11.6712	0	0.358825	GSE84433	High
GSM2236079	11.589	0	0.725952	GSE84433	High
GSM2236080	1.15068	1	0.897361	GSE84433	High
GSM2236082	10.7671	0	-1.30072	GSE84433	Low
GSM2236083	0.575342	1	-2.3913	GSE84433	Low
GSM2236084	10.5205	0	0.0820306	GSE84433	High
GSM2236085	12.4932	0	0.372125	GSE84433	High
GSM2236086	12.2466	0	-1.08917	GSE84433	Low
GSM2236087	12.7397	0	-0.539825	GSE84433	Low
GSM2236088	2.79452	1	-1.55632	GSE84433	Low
GSM2236089	11.8356	0	0.0405487	GSE84433	High
GSM2236090	2.54795	1	-0.833442	GSE84433	Low
GSM2236091	10.1096	1	0.105714	GSE84433	High
GSM2236092	12.2466	0	-0.470992	GSE84433	Low
GSM2236093	12.411	0	-0.961873	GSE84433	Low
GSM2236094	3.0411	1	-0.446013	GSE84433	Low
GSM2236095	12.3288	0	-0.201111	GSE84433	Low
